# Supplementary material for: Neuropathology of 16p13.11 Deletion in Epilepsy
Source: PubMed Central journal article supplement (PMC3327721; doi:10.1371/journal.pone.0034813), 2012-04-16

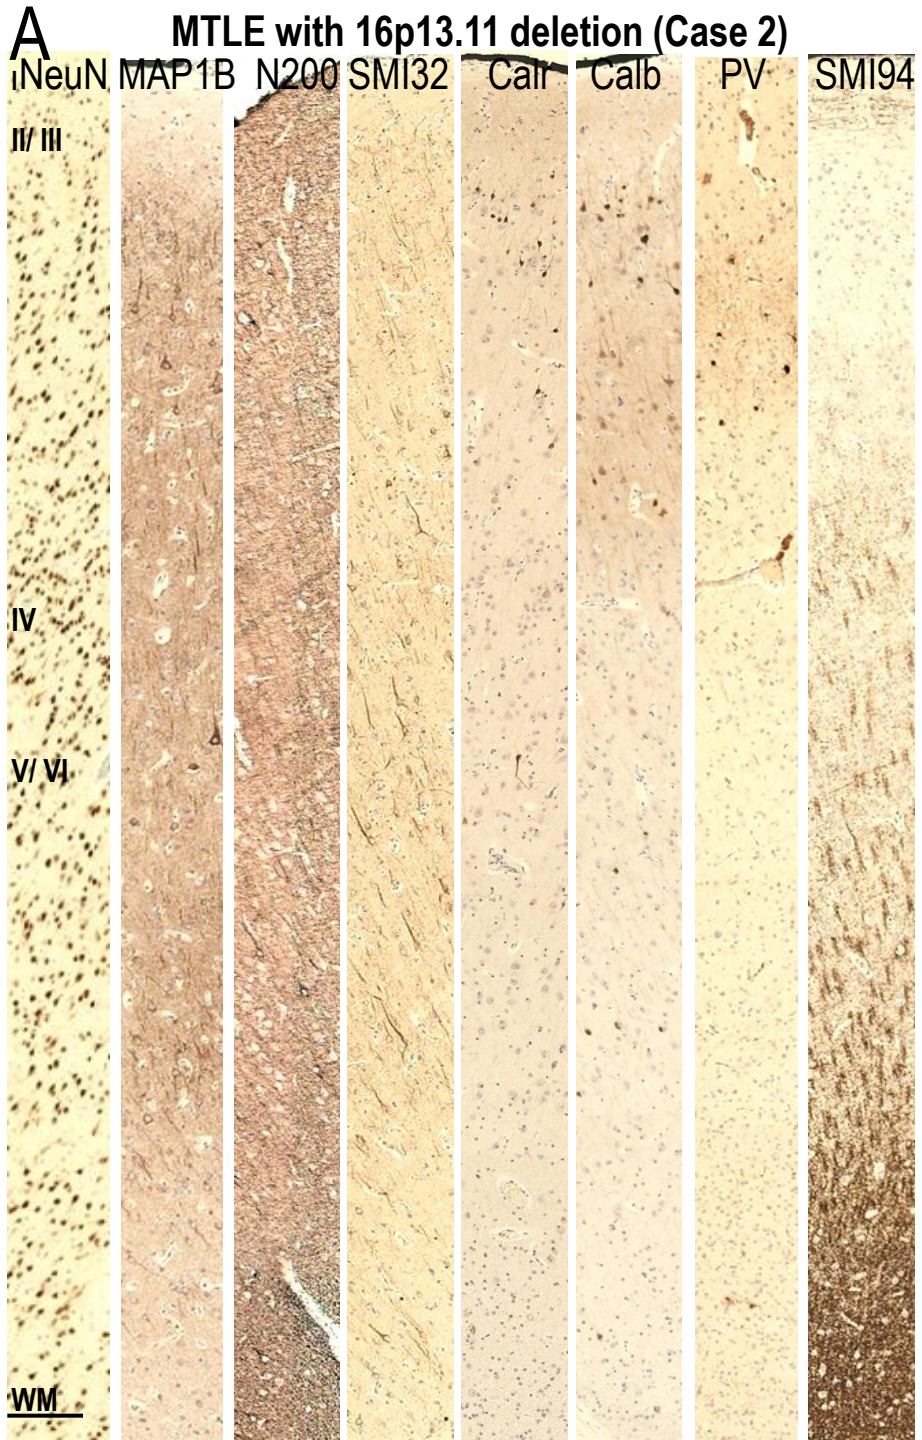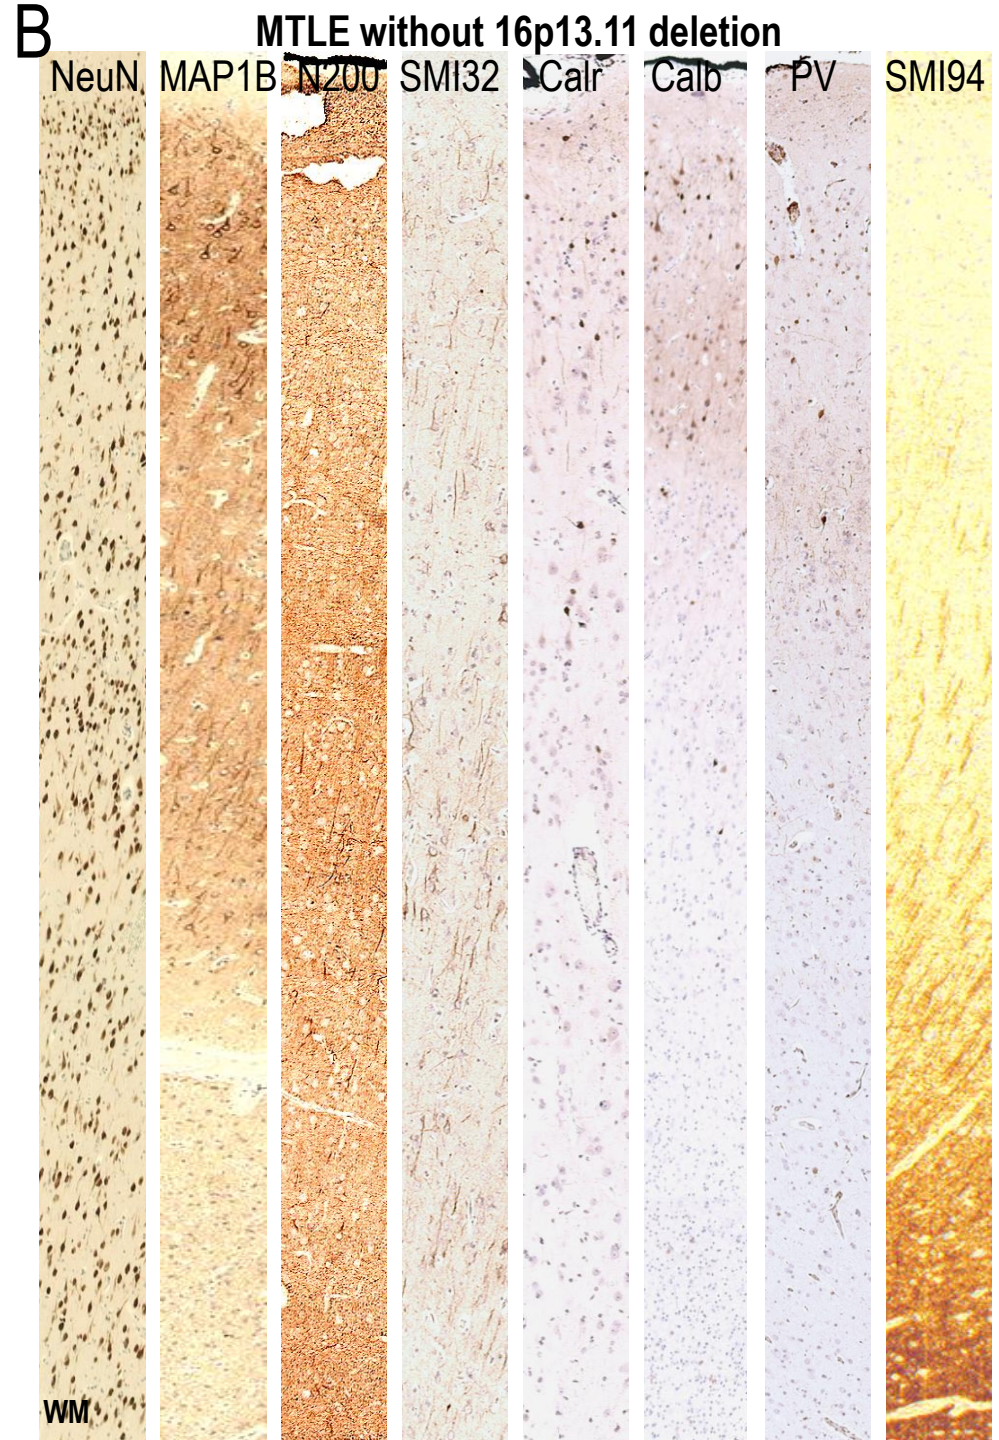

Supplement: pone.0034813.s001.pdf [file pone.0034813.s001.pdf]
